## 1 **Skimming genomes for systematics and DNA barcodes of corals**

2 Andrea M. Quattrini<sup>1</sup>, Luke J. McCartin<sup>2</sup>, Erin E. Easton<sup>3</sup>, Jeremy Horowitz<sup>1</sup>, Herman H.  
3 Wirshing<sup>1</sup>, Hailey Bowers<sup>1</sup>, Kenneth Mitchell<sup>4</sup>, Makiri Sei<sup>1</sup>, Catherine S. McFadden<sup>4</sup>, Santiago  
4 Herrera<sup>2</sup>

5  
6 <sup>1</sup> Department of Invertebrate Zoology, National Museum of Natural History, Smithsonian  
7 Institution, 10th St. & Constitution Ave. NW, Washington, D.C. 20560, United States

8 <sup>2</sup> Department of Biological Sciences, Lehigh University, Bethlehem, PA 18015

9 <sup>3</sup> School of Earth, Environmental, and Marine Sciences, University of Texas Rio Grande Valley,  
10 Port Isabel, TX 78597

11 <sup>4</sup> Department of Biology, Harvey Mudd College, Claremont, CA 91711

12  
13 **Acknowledgments:** Gulf of Mexico collections were funded by the NOAA's National Centers  
14 for Coastal Ocean Science, Competitive Research Program, the Office of Ocean Exploration and  
15 Research, and the RESTORE Science Program under awards NA18NOS4780166,  
16 NA18OAR0110289, and NA17NOS4510096 to PI S. Herrera, and by the Flower Garden Banks  
17 National Marine Sanctuary, Schmidt Ocean Institute, Texas SeaGrant, and Texas Parks and  
18 Wildlife awards to David Hicks (lead PI or co-PI). Southeastern US collections were funded by  
19 the DEEPSEARCH program (lead PI, E. Cordes), funded by the U.S. Department of the Interior,  
20 Bureau of Ocean Energy Management (BOEM), Environmental Studies Program, Washington,  
21 DC, under Contract Number M17PC00009. Puerto Rico specimen collections were funded by  
22 NOAA Ocean Exploration (PI, A. Quattrini), NOAA Fisheries, and the Smithsonian Women's  
23 Committee. Specimens from Florida were collected during the 2019 Workshop on Caribbean  
24 Octocoral Biology funded by NSF OCE-1756381 to H. Lasker and P. Edmunds under Florida  
25 Fish & Wildlife Conservation Commission Special Activity License SAL18-2052A-SR.  
26 Collections in Panama were funded by the Cnidarian Tree of Life project, NSF EF-0531779 to P.  
27 Cartwright under the auspices of the Smithsonian Tropical Research Institute. Research activities  
28 in Puerto Rico waters were coordinated with the Department of Natural and Environmental  
29 Resources of Puerto Rico under permit #2022-IC-010. Research activities in the Flower Garden  
30 Banks National Marine Sanctuary were done per permits FGBNMS-2017-007-A2 and  
31 FGBNMS-2019-003-A2. Genomic sequencing was funded by NOAA OE, NOAA Office of  
32 Education Educational Partnership Program with Minority Serving Institutions awards  
33 NA16SEC4810009 and NA21SEC4810004, and BOEM. We thank S. Cairns, S. Rowley and R.  
34 Cordeiro for help with some species identifications.

35  
36 **Data availability:** Raw sequence reads were submitted to GenBank under BioProject #XXXXX,  
37 and individual genes can be found XXXX. All code can be found on GitHub  
38 [https://github.com/quattrinia/GenomeSkim\\_paper](https://github.com/quattrinia/GenomeSkim_paper), and alignment and tree files can be found on  
39 Figshare #10.25573/data.24319078

40  
41 **Author contributions:** AMQ, SH, and CSM conceived the study and designed the  
42 methodology. AMQ conducted genomic analyses, analyzed data, created figures, and wrote the  
43 manuscript. LJM, HB, JH, KM, and EEE conducted genomic analyses. SH, CSM, JH, and EEE  
44 provided data and taxonomic identifications. MS and HHW constructed DNA libraries. All  
45 authors edited and approved the final version.

46 **Abstract**

47

48 1: Numerous genomic methods developed over the past two decades have enabled the discovery  
49 and extraction of orthologous loci to help resolve phylogenetic relationships across various taxa  
50 and scales. Genome skimming (or low-coverage whole genome sequencing) remains a low-cost,  
51 promising method to not only extract high-copy loci, but also 100s to 1000s of phylogenetically  
52 informative single-copy nuclear loci (e.g., ultraconserved elements [UCEs] and exons) from  
53 contemporary and historical museum samples. The subphylum Anthozoa, which includes  
54 important ecosystem engineers (e.g., stony corals, black corals, anemones and octocorals) in the  
55 marine environment, is in critical need of phylogenetic resolution and thus might benefit from a  
56 genome-skimming approach.

57 2: Genome skimming was conducted on 242 hexacorals and octocorals collected from 1890 to  
58 2022. Using previously developed target-capture baitsets, we bioinformatically obtained UCEs  
59 and exons from the genome-skimming data and incorporated them with data from previously  
60 published target-capture studies. We also extracted partial to whole mitogenomes and nuclear  
61 rRNA genes from the skim data.

62 3: The mean number of UCE and exon loci extracted from the genome skimming data was 1,837  
63  $\pm$  662 SD for octocorals and 1,422  $\pm$  720 loci for hexacorals; phylogenetic relationships were  
64 well resolved within each class. A mean of 1,422  $\pm$  720 loci were obtained from the historical  
65 museum specimens, with 1,253 loci recovered from the oldest specimen collected in 1886 and  
66 1,336 loci recovered from a holotype. The nuclear *rRNA* genes and the majority of mitochondrial  
67 genes were successfully obtained from >95% of samples. Out of 99 circularized mitogenomes,  
68 88% were recovered in samples from which we obtained >15M paired-end (PE) reads (>30M

69 total reads); there was more variability in whether mitogenomes were circularized or not in  
70 samples with <15M PE reads.

71 4: Bioinformatically pulling UCEs, exons, mitochondrial genomes, and nuclear rRNA genes  
72 from genome skimming is a viable and low-cost option for phylogenetic studies. This approach  
73 can be used to review and support taxonomic revisions and reconstruct evolutionary histories,  
74 including historical museum and type specimens.

## 75 76 **Introduction**

77 The advent of novel genomic methods and analyses has revolutionized our ability to  
78 resolve phylogenetic relationships across the tree of life. Numerous genomic methods (e.g.,  
79 whole genome sequencing, transcriptomics, restriction-site associated sequencing, target-  
80 capture) developed over the past two decades have enabled the discovery and extraction of  
81 orthologous loci across multiple phyla. While high-quality whole genomes or transcriptomes are  
82 ideal in many situations, obtaining this genetic information from most animal taxa is still not  
83 technically feasible. But over the past decade, the average cost of high-throughput sequencing  
84 has rapidly decreased (Park & Kim, 2016). Now, we can multiplex many more taxa and obtain  
85 more genomic data (i.e., base pairs) per sample at a much lower cost than ever before. Therefore,  
86 genome skimming, or low-coverage whole genome sequencing (WGS), could be used to readily  
87 obtain enough orthologous loci, including conventional DNA barcodes, at a relatively low cost  
88 for phylogenomic studies (Trevisan et al., 2019; Liu et al., 2021).

89 Genome skimming has been used in prior studies to obtain whole mitochondrial genomes  
90 and nuclear DNA loci for phylogenetic studies (e.g., Malé et al., 2014; Liu et al., 2021;  
91 GoLightly et al., 2022; Taite et al., 2023). In addition, genome skimming has increasingly been  
92 used to help build DNA barcode reference databases for applications such as environmental

93 DNA (eDNA) sequencing (Zeng et al., 2018; Hoban et al., 2022; Zhang et al., 2023). This  
94 method's potential, however, for other applications remains unrealized, as typically more than  
95 99% of the sequence data produced by skimming is not used (Bohmann et al., 2020). Low-  
96 coverage genome skims could readily be used to bioinformatically pull out ultraconserved  
97 elements (UCEs), exons, and other genes of interest. And because this method does not  
98 necessarily need high-quality DNA such as other methods (i.e., RAD Sequencing), genome  
99 skimming might be useful for historical samples that are housed in natural history museums  
100 across the globe (see Tin et al., 2014; Yeates et al., 2016; Bakker 2017; Liu et al., 2021; Hoban  
101 et al., 2022). Thus, this method should be more thoroughly explored for various applications  
102 across different qualities and quantities of genomic DNA.

103         Phylogenomic studies of marine invertebrates might benefit from a genome-skimming  
104 approach. In particular, the subphylum Anthozoa (*sensu* McFadden et al., 2022; phylum  
105 Cnidaria) is in critical need of taxonomic revision and resolution across family, genus, and  
106 species levels that will ultimately help in discriminating species and improving estimates of  
107 species diversity and distribution. Anthozoans are a diverse group of marine invertebrates,  
108 including sea anemones and corals, which are essential in building marine ecosystems from polar  
109 to tropical regions and the coasts to the abyss. Anthozoans currently comprise ~7500 valid  
110 species (Daly et al., 2007) in two classes (Hexacorallia and Octocorallia, McFadden et al., 2022),  
111 but this number might be grossly underestimated (Plaisance et al., 2011; Bridge et al., 2023).  
112 Recently (i.e., in the past five years), the number of phylogenomic studies on anthozoans has  
113 grown rapidly. These studies have used a variety of methods, such as restriction-site associated  
114 sequencing (RADSeq, Reitzel et al., 2013; Herrera & Shank, 2016, Quattrini et al., 2019;  
115 Arrigoni et al., 2020), transcriptomics (Zapata et al., 2015), and target-capture genomics (e.g.,

116 Quattrini et al., 2020; Untiedt et al., 2019; Glon et al., 2021; McFadden et al., 2021, 2022; Bridge  
117 et al., 2023) to resolve questions at a range of scales. Target-capture of UCEs and exons, in  
118 particular, has shown much promise in resolving phylogenetic relationships of anthozoans across  
119 deep (i.e., orders, Quattrini et al., 2020; McFadden et al., 2021, 2022) to shallow (i.e., closely  
120 related species, Erickson et al., 2021; Glon et al., 2023; Bridge et al., 2023) time scales.

121 The original Anthozoa UCE and exons baitset was designed by Quattrini et al. (2018) and  
122 redesigned by Erickson et al. (2021) for Octocorallia and Cowman et al. (2021) for Hexacorallia.  
123 These baitsets target 1000s of loci, but do not include baits for mitochondrial genes or the  
124 nuclear ribosomal RNA (*rRNA*) genes. Although using mitochondrial genes and *rRNA* genes for  
125 phylogenomic studies of Anthozoa is cautioned (Figueroa & Baco 2015; Herrera & Shank, 2016;  
126 Quattrini et al., 2023), the utility of these markers goes beyond phylogenomic analyses. For  
127 example, mitogenome evolution across Anthozoa is intriguing as they exhibit a range of  
128 properties unique among metazoans, including gene order rearrangements (Brockman &  
129 McFadden, 2012; Lin et al., 2014; Figueroa & Baco, 2015; Seiblitz et al., 2022), a mismatch  
130 repair enzyme in Octocorallia (*mtMutS*, Bilewitch & Degnan, 2011), gene introns in the  
131 Hexacorallia (e.g., a homing endonuclease, Fukami et al., 2007, Barrett et al., 2020), and  
132 bipartite mitogenomes (Hogan et al., 2019). In some cases, mitogenomes have been used as  
133 taxonomic characters, as certain gene orders in mitogenomes appear to be restricted to particular  
134 families (see Seiblitz et al., 2022). Finally, with the recent efforts to monitor coral ecosystems  
135 with environmental DNA, there is a need to increase the number of taxa and loci in reference  
136 databases (McCartin et al., in review). Because genome skimming enables the production of low-  
137 coverage yet highly fragmented genomes, this method, followed by bioinformatic analyses, holds  
138 promise in not only obtaining whole mitogenomes and nuclear *rRNA* genes, but also UCEs and

139 exons, as well as other genes of potential interest, from a range of DNA sample types (i.e.,  
140 contemporary to historical samples) for a relatively low cost.

141 Here, we tested the utility of using genome-skimming data to bioinformatically obtain  
142 whole mitogenomes, nuclear *rRNA* genes, UCEs, and exons from hexacorals and octacorals.  
143 Although most of our efforts were focused on recently collected (< 20 years) specimens  
144 preserved specifically for genetic purposes, we also tested the utility of this approach to obtain  
145 UCEs, exons, and mitogenomes from historical material collected more than 100 years ago.

146

## 147 **Methods**

### 148 *Collections*

149 Octacorals (n=177) and hexacorals (n=32, including 30 antipatharians or black corals,  
150 one scleractinian [*Javania*], and one zoanthid [*Umimayanthus*]) were collected from the Gulf of  
151 Mexico, Caribbean Sea, and off the southeastern US coast from 2006 to 2019 on various  
152 expeditions. Specimens were collected with both Remotely Operated Vehicles (ROV) and  
153 SCUBA. Tissue samples were taken in the field, preserved in 95% ethanol and stored at -20°C,  
154 or flash frozen in liquid nitrogen and stored at -80°C. We also added historical, cataloged  
155 octacorals (n=33) collected from 1886 to 2006 from locations worldwide. Most museum  
156 specimens were preserved and/or stored dry or in 70% EtOH. See Supplemental Table 1 for  
157 further details.

158

### 159 *Molecular Lab Work*

160 DNA was extracted in various ways (Table S1). Contemporary samples were extracted  
161 with either a modified CTAB protocol, a salting-out protocol, a GeneJet Genomic DNA

162 Purification kit, or a Qiagen DNEasy extraction kit. Historical samples were all extracted with a  
163 Qiagen DNEasy kit. For some antipatharians and octocorals, DNA was cleaned with a Qiagen  
164 Power Clean Pro kit to remove PCR inhibitors. Samples were quantified with a fluorometer,  
165 either with a Quant-iT or Qubit.

166 For most samples (204 out of 242), library preparation was carried out in the Laboratories  
167 of Analytical Biology at the Smithsonian Institution. The quantity of genomic DNA input into a  
168 library preparation ranged from <0.65 ng to 93 ng total DNA; the average was  $55 \pm 15$  (SD) ng  
169 DNA. Library preparation was carried out using the NEBNext Ultra II FS DNA Library Prep Kit  
170 for inputs  $\leq 100$  ng with the following modifications: the reaction volume was reduced by half,  
171 the fragmentation/end prep incubation was conducted for 10 minutes (contemporary samples) or  
172 2.5 minutes (historical samples), 5  $\mu$ l of iTru Y-yoke adaptor (Glenn et al., 2019) was used  
173 instead of NEBNext Adaptor, adaptor ligation time was 30 minutes, bead cleanups were  
174 performed with KAPA Pure Beads, iTru i5 and i7 indices (Glenn et al., 2019) were used, and 10  
175 cycles of PCR enrichment were conducted. A negative control was included on each plate during  
176 library preparation to test for any potential contamination. All DNA libraries were quantified and  
177 assessed with a Qubit fluorometer High Sensitivity Assay and a TapeStation, and final pools  
178 were created for sequencing on an Illumina NovaSeq (150 bp paired-end (PE) reads, Table S1).  
179 Pool 1 contained 33 historical samples sequenced on one lane of a NovaSeq S4 with 347 other  
180 invertebrate samples for a target read number of 5M PE reads per sample. Pool 2 contained 133  
181 samples sequenced all together on one lane of a NovaSeq X for a target read number of 20M PE  
182 reads per sample. Pool 3 contained 38 samples sequenced with 57 additional samples on one lane  
183 of a NovaSeq X Plus for a target read number of 10M PE reads. To assess whether we could  
184 combine data from other DNA libraries, we included 38 DNA libraries (i.e., pool 4) that were



185 prepared with an Illumina Nextera XT2 kit for NextSeq 500 sequencing at Biopolymers Facility  
186 at Harvard Medical School.

187

### 188 *UCE and Exon Analyses*

189 Demultiplexed reads were trimmed using Trimmomatic v 0.32 or v 0.39 (Bolger et al.,  
190 2014). Trimmed reads were assembled using Spades v. 3.1 or 3.13.0 (Bankevich et al., 2012).  
191 Spades assemblies were then passed to phyluce v 1.7 (Faircloth 2016) to bioinformatically  
192 extract UCEs and exons using previously published bait sets for octocorals (octo-v2, Erickson et  
193 al., 2020) and hexacorals (hexa-v2, Cowman et al., 2020). The phyluce pipeline was used  
194 separately on octocorals and hexacorals as described in the online tutorials  
195 (<https://phyluce.readthedocs.io/en/latest/tutorials/tutorial-1.html>) with some modifications  
196 following Quattrini et al. (2018, 2020). Before aligning with MAFFT v7.130b (Katoh and  
197 Stanley 2013), we combined the data from 208 octocoral samples and the zoanthid  
198 *Umimayanthus* with previously published target-capture data obtained from 187 octocorals and  
199 11 outgroups (Quattrini et al., 2018, 2020, Untiedt et al., 2020, Erickson et al., 2021, McFadden  
200 et al., 2022). We combined the data from 30 black coral samples and the stony coral *Javania*  
201 with previously published (Quattrini et al., 2018, 2020; Horowitz et al., 2022, 2023a) target-  
202 capture data from 106 black corals and four outgroups. After alignment, phyluce was used to  
203 create a 60% taxon-occupancy matrix for all loci, which were then concatenated separately for  
204 black coral (n=141) and octocoral (n=407) datasets. Phylogenomic analyses were conducted  
205 using maximum likelihood in IQTree v 2.1 (Nguyen et al., 2015) on the concatenated datasets  
206 with ultrafast bootstrapping (-bb 1000, Hoang et al., 2018) and the Sh-like approximate  
207 likelihood ratio test (-alrt 1000, SH-aLRT Anisimova et al., 2011). A partitioned model was used



208 (-p). The best model of nucleotide substitution for each partition was found with ModelFinder (-  
209 m TESTMERGE, Kalyaanamoorthy et al., 2017) (Table 1). One octocoral sample, *Tripalea*  
210 *clavaria*, a dried museum specimen, was recovered as sister to all other octocorals. This sample  
211 was likely a contaminated sequence, which was pruned from the alignment. The alignment  
212 (n=406 species) was then re-run in IQTree using the abovementioned parameters.

### 213 214 *Mitogenome Analyses*

215 For most samples (n=204), trimmed reads were also passed to Mitofinder v. 1.4 (Allio et  
216 al., 2020) for mitogenome assembly and annotation using a reference database of either  
217 octocorals or hexacorals downloaded from GenBank. We used trimmed reads in the analyses  
218 with the `-new-genes` parameter (to account for *mtMutS* and HEG) and the translation table 4 (-o).  
219 For the 38 samples from pool 4, mitogenomes were previously reported in Easton and Hicks  
220 (2019, 2020); thus, those results are not included in the present study.

### 221 222 *Nuclear rRNA Analyses*

223 We also mapped, assembled, and extracted nuclear *rRNA* genes from the genome-  
224 skimming data. To obtain a reference sequence for mapping and assembly of octocoral samples,  
225 an annotated nuclear *rRNA* operon sequence, including the nuclear *rRNA* genes as well as *ITS1*  
226 and *ITS2*, was extracted from the NCBI-annotated *Xenia* sp. genome (RefSeq assembly  
227 GCF\_021976095.1, scaffold NW\_025813507.1) at NCBI  
228 ([https://www.ncbi.nlm.nih.gov/genome/annotation\\_euk/all/](https://www.ncbi.nlm.nih.gov/genome/annotation_euk/all/)). As a reference for black corals, we  
229 used a 4,721 bp sequence of *Cladopathes* cf. *plumosa* (GenBank: MT318868.1) from Barrett *et*  
230 *al.* (2020) that spans *18S*, *ITS1*, *5.8S*, *ITS2*, and the majority of *28S*.

231           Trimmed read pairs were merged using BBMerge v 38.84 (Bushnell et al., 2017) with  
232 the normal merge rate and the default settings and then imported into Geneious Prime v.  
233 2023.1.2 (<https://www.geneious.com>). Merged read pairs were mapped and assembled to the  
234 reference sequences using the “Map to Reference(s)” function in Geneious with the sensitivity  
235 set to “Medium-Low Sensitivity/ Fast” and with five mapping iterations. Consensus sequences  
236 were generated from the resulting assemblies with the following settings. At each position, the  
237 threshold was set to 90% identity across all mapped reads for base-calling, a “?” was called if the  
238 coverage was less than 10 mapped reads, and the quality was assigned as the highest quality  
239 from any single base. Each consensus sequence was trimmed to its reference.

240           From the consensus sequences, we extracted and analyzed the *rRNA* genes *18S*, *5.8S*, and  
241 *28S*. The consensus sequences were aligned using MAFFT v. 1.5.0 (algorithm E-INS-I, scoring  
242 matrix 100PAM/K=2) as implemented in Geneious Prime 2023.2.1 (<https://www.geneious.com>).  
243 Two alignments were analyzed, one including *ITS1* and *ITS2* in addition to the rRNA genes and  
244 another with *ITS1* and *ITS2* removed (e.g., *18S*, *5.8S*, and *28S* only). The alignments were  
245 trimmed at the 5’ end to the beginning of *18S* using octocorals as a reference. While we were  
246 able to assemble the entirety of *28S* for octocorals, we were only able to assemble about one-half  
247 of the *28S* gene in black corals, due to incompleteness of the black coral reference sequence  
248 used. Partitions were created for both alignments (with and without the *ITS*). Phylogenetic  
249 inference was then conducted with IQTree using the best model of evolution determined by  
250 Modelfinder (-m TEST, Kalyaanamoorthy et al., 2017) and 1000 ultrafast bootstrap replicates (-  
251 bb 1000).

252           In addition to analyzing these concatenated *rRNA* gene alignments, we also extracted a  
253 ~400 bp DNA barcode from the consensus sequences that is targeted by anthozoan-specific

254 meta-barcoding primers (McCartin et al., in prep). This DNA barcode was compared to  
255 sequences generated via conventional PCR/Sanger sequencing for seven black coral and twenty-  
256 eight octocoral samples (McCartin et al., 2023). These barcoding sequences were aligned with  
257 MAFFT v. 7.49 (LINS-I method) and phylogenetic inference was conducted in the same manner  
258 using IQTree as for the concatenated alignment of *rRNA* gene sequences. Best models of  
259 sequence evolution for the partitioned datasets were chosen by ModelTest as implemented by  
260 IQTree (-m TEST)

261  
262 *Statistical Tests*

263 For historical museum specimens sequenced in pool 1, we conducted analyses to  
264 determine if collection year, library concentration, or DNA concentration impacted the number  
265 of reads or loci obtained. We first determined a significant correlation ( $r=0.58$ ,  $p=0.001$ ) between  
266 DNA and library concentration and thus removed DNA concentration from further analyses (Fig.  
267 2A). Then, we assessed both additive and multiplicative linear regression models on log-  
268 transformed data to determine whether library concentration and collection year affected the  
269 dependent variables of number of reads and loci. The multiplicative models had a higher  
270 adjusted R-squared value (0.32, 0.69) than the additive models (0.24, 0.65) for tests on loci and  
271 read recovery, respectively; thus, we report the results of the multiplicative model below. We  
272 also tested whether the number of loci recovered was influenced by the number of reads obtained  
273 per sample.

274 We also determined whether the number of reads obtained across pools 1-3 significantly  
275 affected the completion of mitogenome circularization when using MitoFinder. We used a one-  
276 way analysis of variance on log-transformed data for both hexacorals and octacorals.

277

## 278 **Results**

### 279 *Assembly Statistics*

280           Of 242 samples, two failed sequencing with only 4,926 and 89,916 PE reads obtained;  
281 thus, these samples were removed from subsequent analyses. The remaining 240 samples had  
282 between 854,547 and 55,565,170 PE reads, with an average of  $17,382,298 \pm 8,065,341$  PE reads.  
283 Pool 1 had an average of  $8,343,203 \pm 2,922,102$ ; Pool 2 had an average of  $23,156,985 \pm$   
284  $3,323,082$ ; Pool 3 had an average of  $12,822,312 \pm 5,512,007$ ; and Pool 4 had an average of  
285  $9,884,551 \pm 857,465$  PE reads. Trimmed reads were assembled into a mean of  $741,347 \pm$   
286  $484,057$  SD contigs per sample (range: 13,422 to 221,4702) (Table S1).

### 287 *UCE and Exon Results*

289           UCEs and exons were successfully recovered from the genome skimming data of  
290 octocorals and hexacorals. For octocorals, 7 to 2,443 loci (mean  $1,837 \pm 662$  SD) out of 3,023  
291 targeted loci were recovered from each individual. The mean locus size was  $1266 \pm 1048$  bp with  
292 a trend of increasing numbers of loci obtained with increasing numbers of PE reads until  $\sim 10M$   
293 PE reads, where the recovery rate reached a plateau (Fig. 1). Out of 206 octocorals,  $<200$  loci  
294 were recovered in only 3% of samples; all of these samples were from pools 1 and 4 with a range  
295 of collection ages from 1960 to 2017 and a 10-fold range of obtained reads ( $973,960$  to  
296  $9,534,512$  PE reads).

297           We were able to recover 18 to 2,361 loci ( $1,422 \pm 720$  loci) from the historical museum  
298 specimens, with 1,253 loci recovered from the oldest specimen collected in 1886 and 1,336 loci  
299 recovered from the holotype of *Sibogorgia dennisgordoni* (Fig. 2). The mean locus size,  
300 however, was smaller ( $790 \pm 578$  bp) compared to the contemporary samples preserved  
301 specifically for genomics ( $1,355 \pm 1,093$  bp). In general, the number of loci recovered from the

302 assemblies increased significantly ( $t=3.663$ ,  $p=0.0009$ ) with the number of reads obtained per  
303 specimen (Fig. 2B). The number of reads increased significantly with an increase in library  
304 concentration ( $t=2.31$ ,  $p=0.028$ ), with an interaction effect of year of collection ( $t=-2.25$ ,  
305  $p=0.032$ ; Fig. 2C, E). Likewise, the number of loci increased significantly with an increase in  
306 library concentration ( $t=2.16$ ,  $p=0.039$ ), with an interaction effect of year of collection ( $t=-2.14$ ,  
307  $p=0.041$ ; Fig. 2D, F)

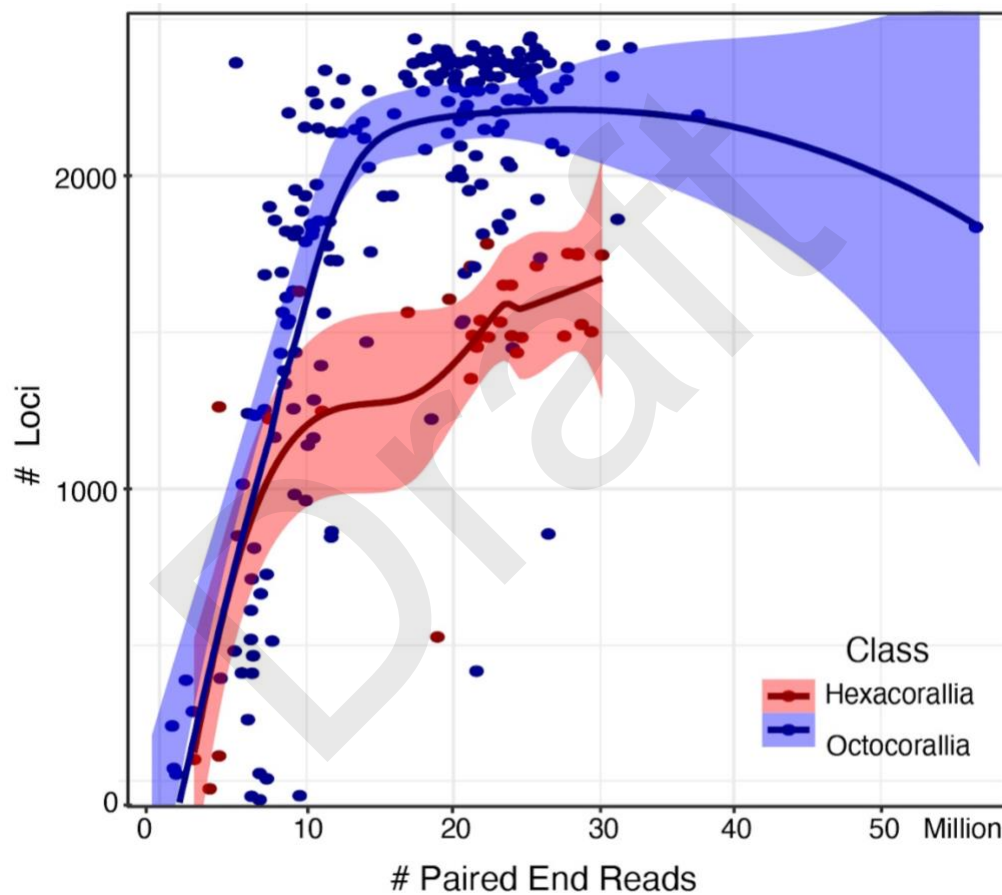

308  
309 Figure 1. The number of loci recovered by the total number of paired-end reads obtained per  
310 sample in both Octocorallia and Hexacorallia. A polynomial regression model with local fitting  
311 was applied.  
312

313           The phylogenetic tree that included all octocoral samples from genome skimming and  
314 prior target-capture work (alignment: 1,262 loci, 243,326 bp) was well supported (Fig. 3, Fig.  
315 S1), and the genome-skimmed samples were recovered in the phylogeny within their respective  
316 families except one dried museum specimen, *Tripalea clavaria*, which was recovered as sister to  
317 all other octocorals and was thus pruned from the phylogeny. We recovered the two reciprocally-  
318 monophyletic orders, Scleralcyonacea and Malacalcyonacea, and added at least 55 species to the  
319 genomic-scale phylogeny of octocorals. Of 405 nodes, 96% had Sh-aLRT values over 80%, and  
320 89% had bootstrap support values over 95%; most of the low values were near the tips. The  
321 zoantharian used as an outgroup in the octocoral phylogeny was correctly recovered in its  
322 respective order.

323

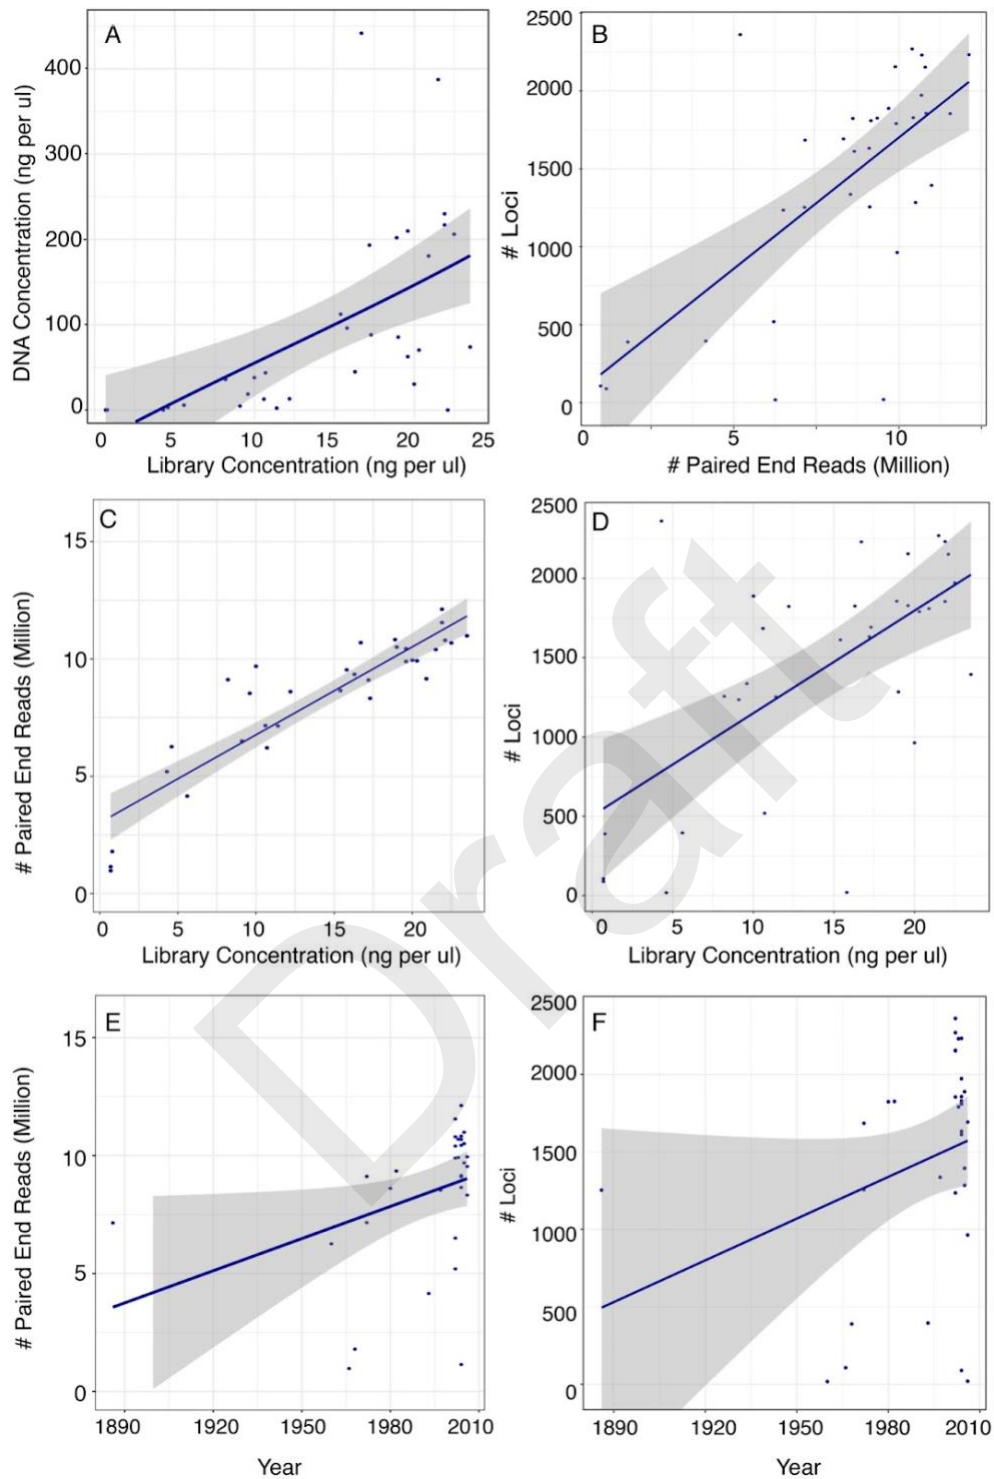

324

325 Figure 2. Data for historical museum samples sequenced in pool 1. (A) Library concentration

326 versus DNA concentration. (B) Number of loci by the number of paired-end reads. (C-F)

327 Number of reads and loci obtained by library concentration and collection year.



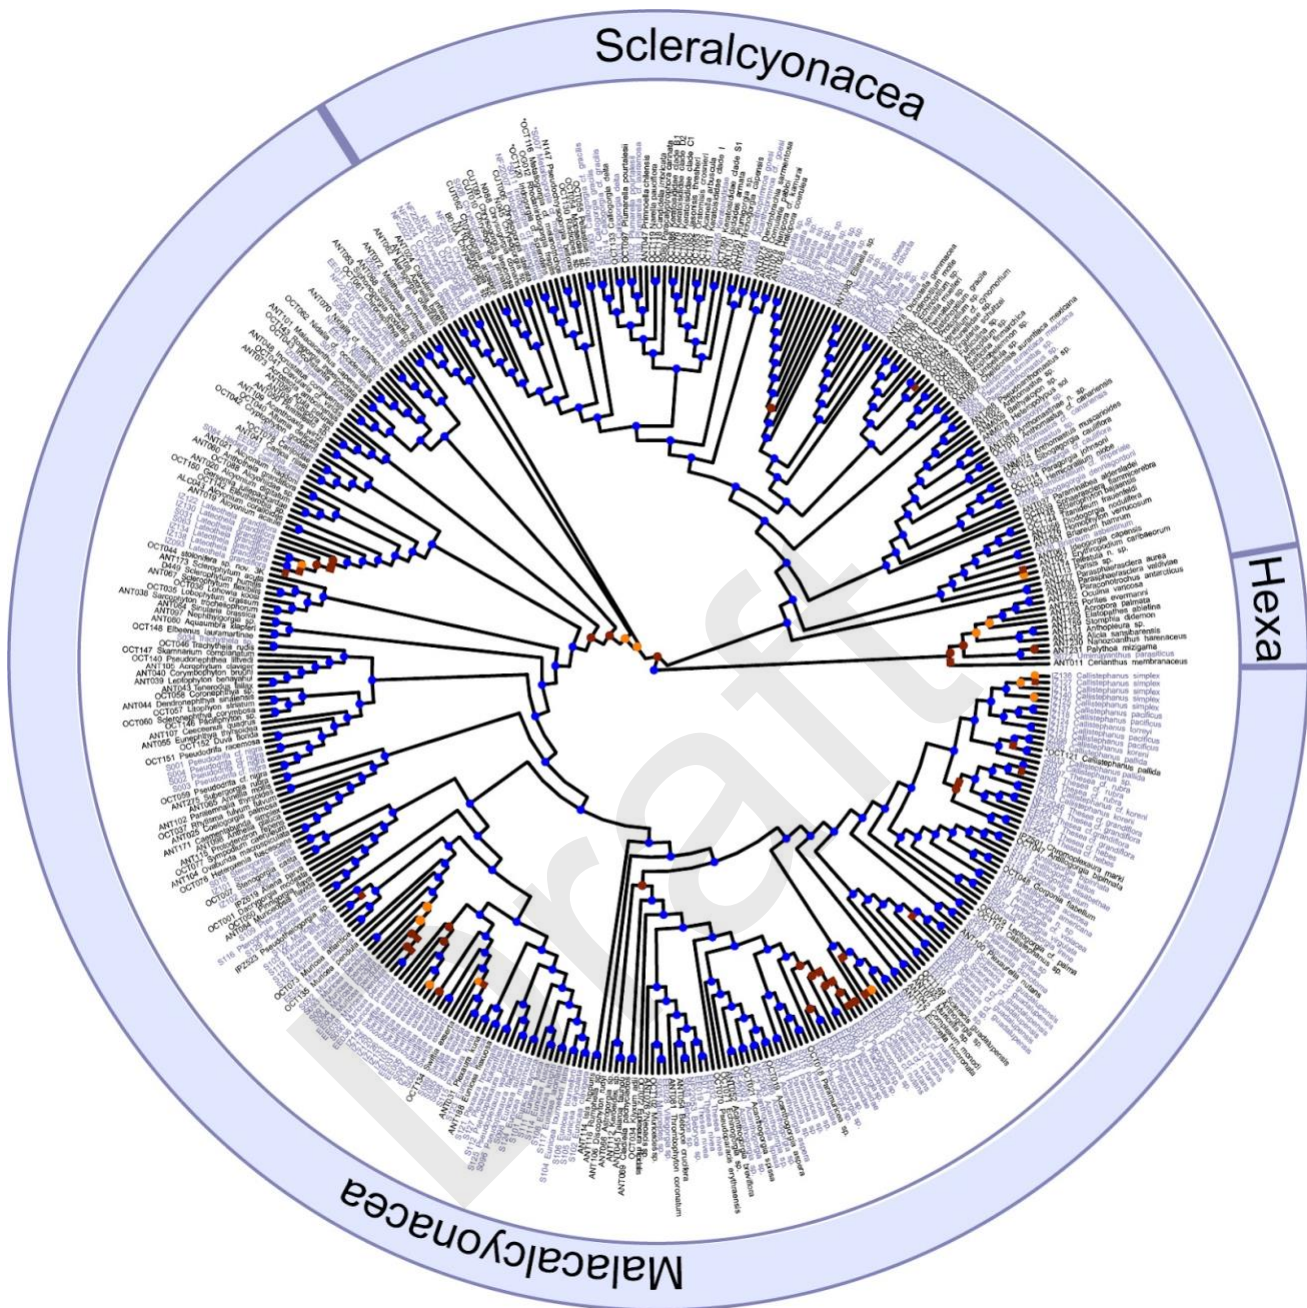

328

329 Figure 3. Maximum likelihood phylogeny of octocorals (purple=genome skim, black=target

330 capture). Outgroups include hexacorals (Hexa). Node support values, represented by circles,

331 include ultrafast bootstraps > 95% (blue), 80-95% (orange), and <80% (red). Where squares are

332 indicated, SH-aLRT values were also < 80%. \*=samples genome skimmed and target-enriched

333

334 For hexacorals, 42 to 1,783 loci (mean  $1,379 \pm 476$  SD) out of 2,476 targeted loci were  
335 recovered from each individual. The mean locus size was  $2,385 \pm 1961$  bp with a trend of  
336 increasing numbers of loci obtained with increasing numbers of PE reads until ~20M PE reads,  
337 where the recovery rate slowed (Fig. 1). Out of 33 hexacorals, <200 loci were recovered in only  
338 9% of samples; all of these samples were black corals collected in 2022 (sequenced in pool 2)  
339 with a range of obtained reads (2,353,550 to 4,045,520 PE reads).

340 The phylogenetic tree that included all antipatharian samples (alignment: 467 loci,  
341 110,353 bp) from genome skimming and prior target-capture work was well supported, and the  
342 genome-skimmed samples were recovered in the phylogeny within their respective families (Fig.  
343 4, Fig. S2). The newly incorporated genome-skim data (representing all seven antipatharian  
344 families) reinforces the monophyletic relationships of Myriopathidae and the monogeneric  
345 family, Leiopathidae. All other families are polyphyletic; notably, the new genome skim data  
346 reveals that Aphanipathidae is polyphyletic, where *Distichopathes hickersonae* and *Elatopathes*  
347 *abietina* are divergent from the rest of Aphanipathidae. This new dataset added at least 10  
348 species to the black coral genomic-scale phylogeny. The scleractinian used as an outgroup in the  
349 hexacoral phylogeny was also recovered in its correct order. Out of 140 nodes, 70% had Sh-  
350 aLRT values over 80%, and 78% had bs values over 95%. In all cases, the lower node support  
351 values were near the tips.

352  
353



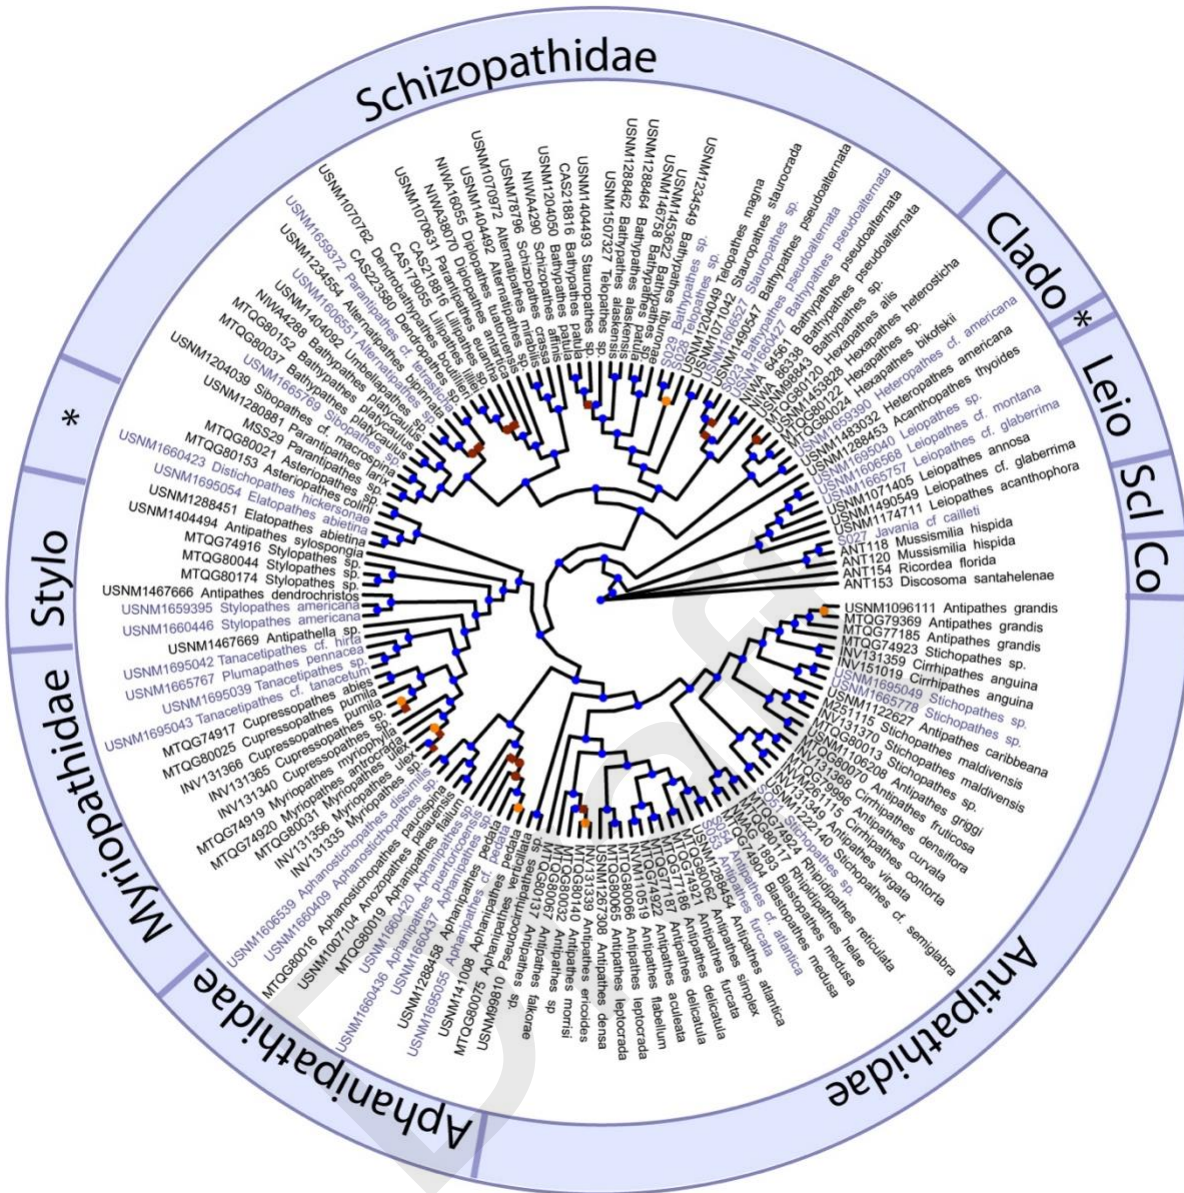

354

355 Figure 4. Maximum likelihood phylogeny of black corals (purple=genome skim, black=target  
 356 capture). Outgroups include Scleractinia (Scl) and Corallimorpharia (Co). Node support values,  
 357 represented by circles, include ultrafast bootstraps > 95% (blue), 80-95% (orange), and <80%  
 358 (red). Where squares are indicated, SH-aLRT values were also < 80%. Leio=Leiopathidae,  
 359 Clado=Cladopathidae, Stylo= Stylopathidae, and \*= Species currently included within the  
 360 polyphyletic family Aphanipathidae.

361

## 362 *Mitogenome Results*

363 All mitochondrial protein-coding genes (PCGs) and *rRNA* genes were successfully  
364 retrieved from 95% of the samples targeted for mitogenome recovery. Of the 170 octocorals, we  
365 recovered 14 PCGs and both rSUs in 168 individuals. Only 10 PCGs and mitochondrial rSUs  
366 were recovered in two octocorals; both were museum samples collected in 1993 and 2005. The  
367 *mtMutS* sequences obtained were successfully integrated with data produced from PCR/Sanger  
368 sequencing, resulting in an alignment of 1074 bp (Fig. S3). Placements of taxa in the *mt MutS*  
369 phylogeny were as expected, and in many cases, the sequence data were 100% identical to the  
370 same species that were Sanger-sequenced. Most (70%) of octocoral mitogenomes were  
371 circularized with mitofinder. The majority of these were from Pool 2, which, on average, had the  
372 highest number of PE reads obtained across all pools (Fig. 5). Significantly more mitogenomes  
373 were circularized with a higher number of reads obtained for octocorals (ANOVA,  $F=96$ ,  
374  $p=0.001$ ). For the 32 hexacorals, only one individual failed mitogenome assembly, with only  
375 three PCGs obtained, yet this individual had over 3,406,440 PE reads. Only 40% of all hexacoral  
376 mitogenomes were circularized with Mitofinder, with the majority of these from Pool 2. For  
377 hexacorals, no significant differences were found between mitogenome circularization and  
378 number of reads obtained (ANOVA,  $F=0.25$ ,  $p>0.05$ ).

## 379 380 *Nuclear rRNA Results*

381 Nuclear *rRNA* genes were successfully obtained from all but one sample. Reads mapped  
382 to at least 95% of the reference sequence used, and the mean coverage was 4,317x. The length of  
383 the assembled consensus sequences ranged from 4,142 to 6,136 bp, and differences in length  
384 were mainly because the black coral reference did not include all of the 28S. Across the 478 bp  
385 alignment barcoding region of 28S, sequences generated from genome skimming were 100% (p-

386 distance) similar to their respective Sanger sequence except in the case of one specimen of  
387 *Sibogorgia cf. cauliflora* (Fig. S4). This specimen had numerous ambiguous bases across the  
388 478 bp alignment and was 15% divergent from the Sanger sequence. The phylogenetic tree  
389 produced from the *rRNA* genes (6,031 bp alignment) included taxa in positions as expected,  
390 except for *Sibogorgia cf. cauliflora* and *Plumarella pourtalesii* (Fig. S5).

391

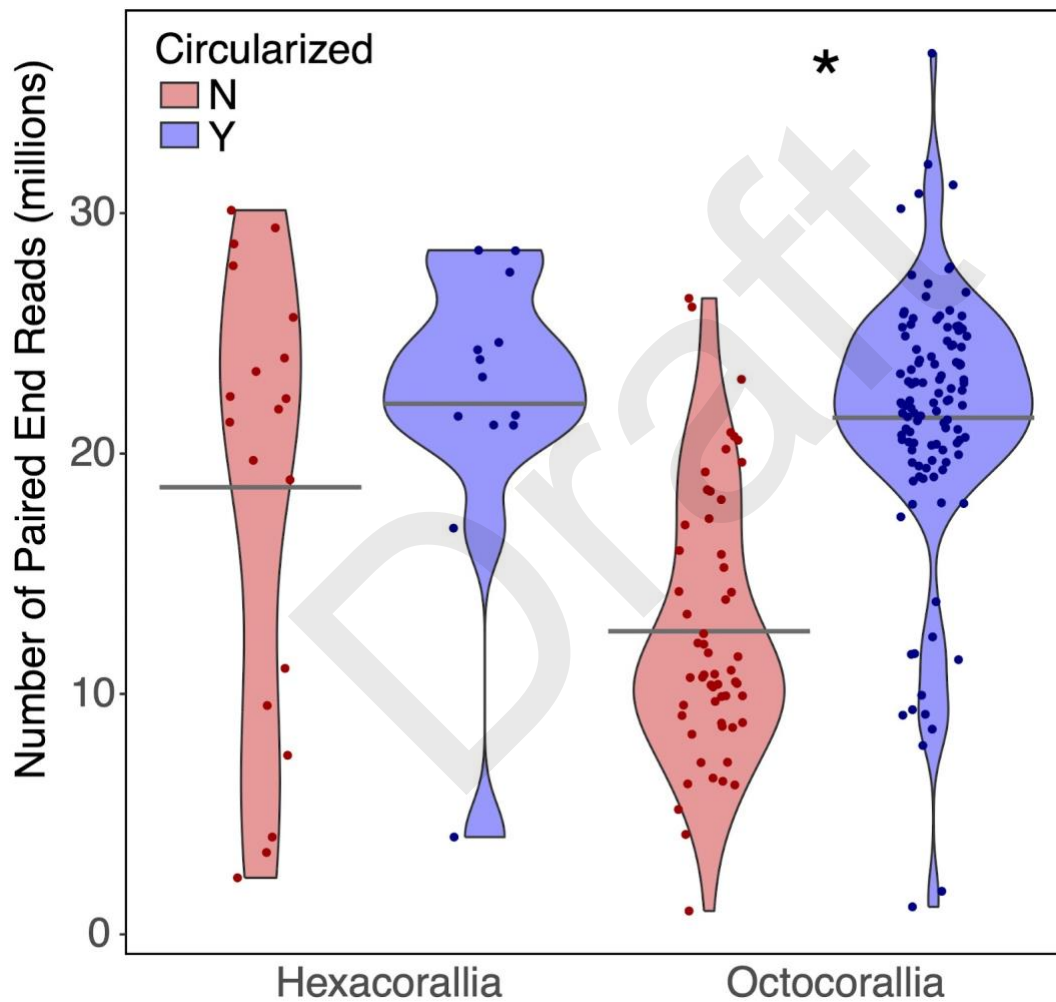

392

393 Figure 5. Circularization of mitogenomes by the number of paired-end reads from each sample  
394 for Octocorallia (n=171, 114 circular, 57 non-circular) and Hexacorallia (n=32, 13 circular, 19  
395 non-circular). (\*p=0.001). Gray bars indicate the group mean.

396

## 397 **Discussion**

### 398 *The Utility of Genome Skimming*

399           Genome skimming is an effective approach for obtaining a range of loci useful for  
400 systematics and reference DNA barcode libraries of anthozoans. We bioinformatically obtained  
401 >1400 UCE/exon loci on average from both hexacorals and octocorals, indicating the utility of  
402 genome skimming for obtaining loci that are otherwise captured through a target-capture  
403 enrichment process. To highlight the similarity of results obtained from genome skimming and  
404 target capture, nine octocorals that were genome skimmed in this study were also target-captured  
405 in prior work (McFadden et al., 2022). In all cases, the numbers of UCE loci obtained from the  
406 skimmed samples were similar to or slightly higher (~200 loci) than the target-captured samples,  
407 and five pairs of skimmed/target-captured samples included in the phylogeny were recovered as  
408 sister taxa. In addition to obtaining UCE/exon loci, we obtained nuclear ribosomal RNA gene  
409 sequences with high mapping coverage to reference sequences and most mitochondrial  
410 genes. Further, with minimal bioinformatic effort (i.e., just using one assembly program), we  
411 were able to obtain complete, circularized mitogenomes for 60% of all the samples. Our results  
412 indicate that this approach can also be used on historical-museum samples, where most target  
413 regions (i.e., mitochondrial genes, nuclear *rRNA* genes, UCES/exons) were successfully  
414 obtained.

415           Historical specimens, many of which had highly-degraded and low-quantity DNA (Table  
416 S1), performed very well with genome skimming. None of these historical specimens were  
417 preserved specifically for genetic applications. Yet, we recovered most, if not all, mt genes,  
418 nuclear *rRNA* genes, and more than 1000 UCE/exon loci from 75% of the samples. In addition,  
419 this approach is useful for obtaining numerous loci from type specimens (i.e., *Sibogorgia*

420 *dennisgordoni*) and specimens collected over 100 years ago. Our results, however, suggest that  
421 DNA concentration is directly correlated with library concentration, and higher library  
422 concentrations yield more reads and, thus, more UCE/exon loci. In contrast to expectations, the  
423 collection year had minimal impacts on UCE/exon loci obtained from the skimming data.  
424 Museum specimens used in this study were preserved in various ways, including drying, 70%  
425 EtOH, and 95% EtOH. Some specimens were likely fixed in formalin, but this information is  
426 often not retained in museum records. Thus, preservation type could confound a direct  
427 relationship of collection year with the number of loci obtained. Therefore, we recommend that  
428 researchers try genome skimming on various museum samples, regardless of collection age or  
429 preservation type. We also urge the use of type material in genome skimming studies to help  
430 resolve taxonomic issues in both classes of hexacorals and octocorals. Because the first step of  
431 preparing NEB genomic libraries is shearing DNA, one can skip or reduce the shearing time and  
432 use just the degraded DNA that is recovered from museum specimens in the DNA library  
433 preparation workflow. Our results here suggest that genome skimming is a simple genomic  
434 approach that can help unlock our historical museum collections, thus ultimately helping to  
435 resolve phylogenetic relationships across Metazoa.

436         There have been increasing efforts to use environmental (e)DNA sampling to  
437 characterize biodiversity and monitor health across ecosystems. It is clear, however, that the  
438 classification of eDNA sequences at a meaningful taxonomic resolution relies on the  
439 completeness of reference databases of DNA barcodes to which eDNA can be compared (Gold et  
440 al., 2021). But DNA barcodes remain missing for many metazoan taxa (e.g., Ransome et al.,  
441 2017; Pappalardo et al., 2021), and there are no standard barcodes that can be used to resolve  
442 species or even genera across diverse taxa, although both mitochondrial genes and nuclear *rRNA*



443 genes are often used. Therefore, it is a critical time to increase barcode data across both taxa and  
444 gene regions. Our results suggest that genome skimming is one way to improve reference  
445 sequence databases simply and rapidly for applications like eDNA metabarcoding. We provide  
446 evidence that 28S *rRNA* sequences recovered from the genome skimming data were largely  
447 congruent to sequences generated from conventional PCR amplification and Sanger sequencing.  
448 Another obvious advantage of genome skimming over Sanger sequencing is the ability to  
449 generate sequencing data for multiple barcoding genes simultaneously, including nuclear *rRNA*  
450 and mitochondrial genes.

451 For the amount of data obtained, genome skimming is a relatively cost-effective method  
452 compared to other genomic and genetic approaches. Library preparation, sequencing (10-20M  
453 PE reads), and quantification cost ~\$60-75 USD for this study. This same amount would  
454 facilitate sequencing ~6-7 loci (approximate costs, \$6-8 for sequencing, \$5 for PCR reaction)  
455 through traditional PCR and Sanger. Although the average costs of genome skimming are  
456 relatively low compared to Sanger sequencing, the high costs and/or access to genomic  
457 sequencing facilities, high-performance computing, and bioinformatics training might still be  
458 prohibitive for some researchers, particularly those in low-income countries (see, e.g., Rana et  
459 al., 2020; Yek et al., 2022; Whiteford et al., 2023). By collaborating across international borders,  
460 we can easily pool samples from several research groups for sequencing at a genomic sequencing  
461 facility, at least in situations where DNA exchange restrictions are not an issue.

462  
463 *New insights into octocoral phylogeny*

464 At the genus level, the phylogeny of octocorals constructed here using a combination of  
465 data obtained from target-enrichment of conserved elements and genome skimming was largely  
466 congruent with that published previously using data from target-enrichment only (McFadden et

467 al., 2022). Relationships among families were also mostly in agreement with that previous  
468 analysis, with the most notable exception being the recovery of the family Cladiellidae, sister to  
469 the gorgonian families Euplexauridae and Paramuriceidae, as was also found by Quattrini et al.  
470 (2023). The subordinal-level clades defined by McFadden et al. (2022) were not, however, as  
471 well supported by the analysis presented here (Fig. 3). These differences may be attributable to  
472 differences between analyses in taxon sampling or the numbers and identities of loci included  
473 (i.e., including saturated loci) and exemplify the challenges inherent in resolving the deepest  
474 nodes in a group of organisms that evolved in the pre-Cambrian (McFadden et al., 2021).

475 Genomic data were obtained for the first time from representatives of 11 genera  
476 (*Paracalyptophora* Kinoshita, 1908; *Nicella* Gray, 1870; *Iciligorgia* Duchassaing, 1870;  
477 *Lateothela* Moore et al., 2017; *Hedera* Conti-Jerpe & Freshwater, 2017; *Chromoplexaura*  
478 Williams, 2013; *Pseudoplexaura* Wright & Studer, 1889; *Placogorgia* Wright & Studer, 1889;  
479 *Villogorgia* Duchassaing & Michelotti, 1860; *Aliena* Breedy et al., 2023; and *Thesea*  
480 Duchassaing & Michelotti, 1860). Phylogenetic placement of each of these genera was congruent  
481 with expectations based on previous phylogenetic analyses of mitochondrial and nuclear *rRNA*  
482 gene trees (Cairns & Wirshing 2018; McFadden et al., 2022; Breedy et al., 2023). The  
483 phylogenomic analysis recovered *Thesea* as polyphyletic, with some species grouping in the  
484 family Paramuriceidae and others in the Gorgoniidae, which is also congruent with previous  
485 phylogenetic analyses (Carpinelli et al., 2022). The paraphyletic relationships of *Gorgonia* to  
486 *Antillogorgia* and of *Plexaura* and *Pseudoplexaura* to *Eunicea* have also been recovered in  
487 previous studies (Grajales et al., 2007; Torres-Suarez 2014), as has the polyphyly exhibited by  
488 *Leptogorgia* (Poliseno et al., 2017).

489 Molecular data were obtained for the first time for four genera, allowing their familial  
490 relationships to be assessed. *Acanthoprimnoa* Cairns & Bayer, 2004, a genus whose membership  
491 in Primnoidae has never been questioned (Cairns & Bayer, 2004; Cairns & Wirshing, 2018), was  
492 instead found to be sister to Ifalukellidae. *Tripalea* Bayer, 1955, placed in Spongiodermidae  
493 based on morphology (Cairns & Wirshing 2015), appears instead to belong to Incrustatidae in  
494 the order Malacalcyonacea. Finally, *Caliacis* Deichmann, 1936 and *Pseudothellogorgia* van  
495 Ofwegen, 1991, genera whose familial affinities were left *incertae sedis* by McFadden et al.  
496 (2022), each occupy unique positions within the clade of malacalcyonacean gorgonians (clade 8  
497 of McFadden et al., 2022), suggesting they each deserve family status. Before proposing those  
498 new families, however, it will be necessary to confirm the species-level identification of the  
499 material we sequenced by comparison to original type material.

500  
501 *New insights into antipatharian phylogeny*

502 The black coral phylogeny is mostly congruent with previous reconstructions (Horowitz  
503 et al., 2022, 2023b); however, this study includes three genera (*Distichopathes* Opresko, 2004,  
504 *Plumapathes* Opresko, 2001, and *Tanacetipathes* Opresko, 2001) that have been sequenced for  
505 the first time with high-throughput genomic techniques, providing new insights into  
506 phylogenomic relationships within the order. *Distichopathes* Opresko, 2004 was recovered sister  
507 to *Elatopathes* Opresko, 2004. Along with *Asteriopathes* Opresko, 2004, these three genera are  
508 currently placed in Aphanipathidae Opresko, 2004, but they form a monophyletic clade divergent  
509 from the rest of Aphanipathidae. Instead, the three genera show affinity to Stylopathidae  
510 Opresko, 2006, a finding consistent with Opresko et al. (2020) based on three mitochondrial and  
511 three nuclear gene regions. The recovered polyphyletic relationship of *Plumapathes* Opresko,  
512 2001 and *Tanacetipathes* Opresko, 2001 (both of which reside in Myriopathidae Opresko, 2001)

513 is notable as they possess distinctly different branching characteristics (planar in *Plumapathes* vs  
514 bottlebrush in *Tanacetipathes*). However, Horowitz et al. (2023b) emphasized that smaller-scale  
515 features, such as polyps and spines, are often more informative than branching  
516 characteristics. Most species within the Myriopathidae have very similar spine and polyp  
517 characteristics. Thus, these genera within Myriopathidae require further examination for a  
518 possible taxonomic revision.

519 Six out of the seven families in the order are polyphyletic based on this and previous  
520 phylogenetic reconstructions (Brugler et al. 2013, Horowitz et al. 2022, 2023a). Notably, the  
521 family Aphanipathidae contains genera spread across the tree (identified by ‘\*’ in Fig. 4),  
522 highlighting the need for taxonomic revisions. However, a formal taxonomic review cannot be  
523 conducted because the type for Aphanipathidae by subsequent designation, *Aphanipathes*  
524 *sarothamnoides* Brook, 1889 has yet to be sequenced. Therefore it is not yet certain which clade  
525 represents the Aphanipathidae. This study demonstrates that genome skimming and target  
526 enrichment are suitable methods to yield high phylogenetic resolution of antipatharians. All that  
527 is needed now are sequence data from holotype or topotype material representing each nominal  
528 and currently accepted genus to fill gaps and better support taxonomic revisions.

529  
530

### 531 **Figure captions**

532

533 Figure 1. Number of loci recovered by total number of paired-end reads obtained per sample in  
534 both Octocorallia and Hexacorallia.

535

536 Figure 2. Data for historical museum samples sequenced in pool 1. (A) Library concentration  
537 versus DNA concentration. (B) Number of loci by number of paired-end reads. (C-F) Number of  
538 reads and loci obtained by library concentration and collection year.

539  
540 Figure 3. Maximum likelihood phylogeny of octocorals (purple=genome skim, black=target  
541 capture). Outgroups include hexacorals (hexa). Node support values, represented by circles,  
542 include ultrafast bootstraps > 95% (blue), 80-95% (orange), and <80% (red). Where squares are  
543 indicated, SH-aLRT values were also < 80%. \*=samples genome skimmed and target-enriched

544  
545 Figure 4. Maximum likelihood phylogeny of black corals (purple=genome skim, black=target  
546 capture). Outgroups include Scleractinia (Scl) and Corallimorpharia (Co). Node support values,  
547 represented by circles, include ultrafast bootstraps > 95% (blue), 80-95% (orange), and <80%  
548 (red). Where squares are indicated, SH-aLRT values were also < 80%. Leio=Leiopathidae,  
549 Clado=Cladopathidae, Stylo= Stylopathidae, and \*= Species currently included within the  
550 polyphyletic family Aphanipathidae.

551  
552  
553 Figure 5. Circularization frequency of mitogenomes by number of paired-end reads recovered in  
554 each sample for Octocorallia and Hexacorallia. (\*p=0.001)

555

## 556 **Supplemental Information**

557

558 **Supplemental Table 1.** Summary statistics for all samples genome skimmed in the present  
559 study.

560

561 **Supplemental Figure 1.** Maximum-likelihood phylogenetic tree of Octocorallia with branch  
562 lengths shown. Tree rooted to Hexacorallia. Tip labels in purple=genome skim, black=target  
563 capture. Ultrafast bootstraps and Sh-alRT values both >95% unless indicated.

564

565 **Supplemental Figure 2.** Maximum-likelihood phylogenetic tree of Antipatharia with branch  
566 lengths shown. Tree rooted to Octocorallia. Tip labels in purple=genome skim, black=target  
567 capture. Ultrafast bootstraps and Sh-alRT values both >95% unless indicated.

568

569 **Supplemental Figure 3.** Maximum-likelihood phylogenetic tree of *mtMutS* sequences (1,074  
570 bp alignment) generated from genome skimming data and PCR/Sanger Sequencing (McFadden  
571 et al. 2022). The Scleractyonacea is rooted to the Malacalcyonacea. Ultrafast bootstraps are  
572 included.

573  
574  
575  
576  
577  
578  
579  
580  
581  
582  
583

**Supplemental Figure 4:** Maximum-likelihood phylogenetic tree of 28S *rRNA* barcode sequences (478 bp alignment) generated from 35 samples via conventional PCR and Sanger sequencing and from genome skimming data. The tree is rooted at its midpoint. Ultrafast bootstraps are included.

**Supplemental Figure 5.** Maximum-likelihood phylogenetic tree of *rRNA* gene sequences (6,031 bp alignment) generated from genome skimming data. The tree is rooted at its midpoint. Ultrafast bootstraps are included.

## 584 **References**

585  
586  
587  
588  
589  
590  
591  
592  
593  
594  
595  
596  
597  
598  
599  
600  
601  
602  
603  
604  
605  
606  
607  
608  
609  
610  
611  
612  
613  
614  
615  
616  
617  
618

Allio, R., Schomaker-Bastos, A., Romiguier, J., Prosdocimi, F., Nabholz, B., & Delsuc, F. (2020). MitoFinder: Efficient automated large-scale extraction of mitogenomic data in target enrichment phylogenomics. *Molecular Ecology Resources*, 20(4), 892-905.

Arrigoni, R., Berumen, M. L., Mariappan, K. G., Beck, P. S., Hulver, A. M., Montano, S., ... & Benzoni, F. (2020). Towards a rigorous species delimitation framework for scleractinian corals based on RAD sequencing: the case study of *Leptastrea* from the Indo-Pacific. *Coral Reefs*, 39, 1001-1025.

Bakker, F. T. (2017). Herbarium genomics: skimming and plastomics from archival specimens. *Webbia*, 72(1), 35-45.

Bankevich, A., Nurk, S., Antipov, D., Gurevich, A. A., Dvorkin, M., Kulikov, A. S., ... & Pevzner, P. A. (2012). SPAdes: a new genome assembly algorithm and its applications to single-cell sequencing. *Journal of computational biology*, 19(5), 455-477.

Barrett, N. J., Hogan, R. I., Allcock, A. L., Molodtsova, T., Hopkins, K., Wheeler, A. J., & Yesson, C. (2020). Phylogenetics and mitogenome organisation in black corals (Anthozoa: Hexacorallia: Antipatharia): an order-wide survey inferred from complete mitochondrial genomes. *Frontiers in Marine Science*, 7, 440.

Bilewitch, J. P., & Degnan, S. M. (2011). A unique horizontal gene transfer event has provided the octocoral mitochondrial genome with an active mismatch repair gene that has potential for an unusual self-contained function. *BMC evolutionary biology*, 11, 1-15.

Bohmann, K., Mirarab, S., Bafna, V., & Gilbert, M. T. P. (2020). Beyond DNA barcoding: The unrealized potential of genome skim data in sample identification.

Bolger, A. M., Lohse, M., & Usadel, B. (2014). Trimmomatic: a flexible trimmer for Illumina sequence data. *Bioinformatics*, 30(15), 2114-2120.

Breedy, O., McFadden, C.S., & Cortés, J. (2023) An enigmatic new octocoral species (Anthozoa, Octocorallia, Malacalcyonacea) from Isla del Coco National Park. *ZooKeys*, 1169, 317-331.



- 619  
620 Bridge, T. C., Cowman, P. F., Quattrini, A. M., Bonito, V. E., Sinniger, F., Harii, S., ... & Baird,  
621 A. H. (2023). A tenuous relationship: traditional taxonomy obscures systematics and biogeography  
622 of the '*Acropora tenuis*' (Scleractinia: Acroporidae) species complex. *Zoological Journal of the*  
623 *Linnean Society*, zlad062.
- 624  
625 Brockman, S. A., & McFadden, C. S. (2012). The mitochondrial genome of *Paraminabea*  
626 *aldersladei* (Cnidaria: Anthozoa: Octocorallia) supports intramolecular recombination as the  
627 primary mechanism of gene rearrangement in octocoral mitochondrial genomes. *Genome biology*  
628 *and evolution*, 4(9), 994-1006.
- 629  
630 Cairns, S. D., & Bayer, F. M. (2004). Studies on western Atlantic Octocorallia (Coelenterata:  
631 Anthozoa). Part 5: The genera *Plumarella* Gray, 1870; *Acanthoprimum*, n. gen.; and *Candidella*  
632 Bayer, 1954. *Proceedings of the Biological Society of Washington*.
- 633  
634 Cairns, S.D., & Wirshing, H.H. (2018) A phylogenetic analysis of the Primnoidae (Anthozoa:  
635 Octocorallia: Calcaxonia) with analyses of character evolution and a key to the genera and  
636 subgenera. *BMC Evolutionary Biology*, 18, 66.
- 637  
638 Carpinelli, A.N., Cordeiro, R.T.S., Castro, C.B., & Kitahara, M.V. (2022) *Thesea pyrrha* sp.  
639 nov., a new shallow-water octocoral (Cnidaria, Anthozoa) from southwestern Atlantic, and  
640 implications on the systematics of the genus. *Zootaxa*, 5116(1), 89-106.
- 641  
642 Cowman, P. F., Quattrini, A. M., Bridge, T. C., Watkins-Colwell, G. J., Fadli, N., Grinblat, M.,  
643 ... & Baird, A. H. (2020). An enhanced target-enrichment bait set for Hexacorallia provides  
644 phylogenomic resolution of the staghorn corals (Acroporidae) and close relatives. *Molecular*  
645 *Phylogenetics and Evolution*, 153, 106944.
- 646  
647 Daly, M., Brugler, M. R., Cartwright, P., Collins, A. G., Dawson, M. N., ... & Stake, J. L. (2007).  
648 The phylum Cnidaria: a review of phylogenetic patterns and diversity 300 years after Linnaeus.  
649
- 650 Easton, E. E. and Hicks, D. (2019). Complete mitochondrial genome of *Callogorgia* cf. *gracilis*  
651 (Octocorallia: Calcaxonia: Primnoidae). *Mitochondrial DNA Part. B.* 4, 361–362.
- 652  
653 Easton, E. E., Hicks, D. (2020). Complete mitogenome of *Carijoa riisei* (Octocorallia:  
654 Alcyonacea: Stolonifera: Clavulariidae). *Mitochondrial DNA Part. B.* 5, 1826–1827.
- 655  
656 Erickson, K. L., Pentico, A., Quattrini, A. M., & McFadden, C. S. (2021). New approaches to  
657 species delimitation and population structure of anthozoans: Two case studies of octocorals using  
658 ultraconserved elements and exons. *Molecular ecology resources*, 21(1), 78-92.
- 659  
660 Faircloth, B. C. (2016). PHYLUCE is a software package for the analysis of conserved genomic  
661 loci. *Bioinformatics*, 32(5), 786-788.
- 662



- 663 Figueroa, D. F., & Baco, A. R. (2015). Octocoral mitochondrial genomes provide insights into  
664 the phylogenetic history of gene order rearrangements, order reversals, and cnidarian  
665 phylogenetics. *Genome Biology and Evolution*, 7(1), 391-409.
- 666
- 667 Fukami, H., Chen, C. A., Chiou, C. Y., & Knowlton, N. (2007). Novel group I introns encoding  
668 a putative homing endonuclease in the mitochondrial *cox1* gene of scleractinian corals. *Journal*  
669 *of molecular evolution*, 64, 591-600.
- 670
- 671 Glenn, T. C., Nilsen, R. A., Kieran, T. J., Sanders, J. G., Bayona-Vásquez, N. J., Finger, J. W.,  
672 Pierson, T. W., Bentley, K. E., Hoffberg, S. L., Louha, S., Garcia-De Leon, F. J., Angel del Rio  
673 Portilla, M., Reed, K. D., Anderson, J. L., Meece, J. K., Aggrey, S. E., Rekaya, R., Alabady, M.,  
674 Belanger, M., Winker, K., & Faircloth, B. C. (2019). Adapterama I: universal stubs and primers  
675 for 384 unique dual-indexed or 147,456 combinatorially-indexed Illumina libraries (iTru &  
676 iNext). *PeerJ* 7:e7755.
- 677
- 678 Glon, H., Quattrini, A., Rodríguez, E., Titus, B. M., & Daly, M. (2021). Comparison of  
679 sequence-capture and ddRAD approaches in resolving species and populations in hexacorallian  
680 anthozoans. *Molecular Phylogenetics and Evolution*, 163, 107233.
- 681
- 682 Glon, H., Häussermann, V., Brewin, P. E., Brickle, P., Kong, S., Smith, M. L., & Daly, M.  
683 (2023). There and back again: the unexpected journeys of *Metridium* de Blainville, 1824  
684 between the old oceans and throughout the modern world. *The Biological Bulletin*, 244(1), 9-24.
- 685
- 686 Gold, Z., Sprague, J., Kushner, D. J., Zerecero Marin, E., & Barber, P. H. (2021). eDNA  
687 metabarcoding as a biomonitoring tool for marine protected areas. *PLoS One*, 16(2), e0238557.
- 688
- 689 Golightly, C., DeLeo, D. M., Perez, N., Chan, T. Y., Landeira, J. M., Bracken-Grissom, H. D., &  
690 Wolfe, J. (2022). Tracing the evolution of bioluminescent light organs across the deep-sea  
691 shrimp family Sergestidae using a genomic skimming and phylogenetic approach. *Invertebrate*  
692 *Systematics*, 36(1), 22-35.
- 693
- 694 Grajales et al., 2007; Herrera, S., & Shank, T. M. (2016). RAD sequencing enables  
695 unprecedented phylogenetic resolution and objective species delimitation in recalcitrant  
696 divergent taxa. *Molecular phylogenetics and evolution*, 100, 70-79.
- 697
- 698 Hoang, D. T., Chernomor, O., Von Haeseler, A., Minh, B. Q., & Vinh, L. S. (2018). UFBoot2:  
699 improving the ultrafast bootstrap approximation. *Molecular biology and evolution*, 35(2), 518-  
700 522.
- 701
- 702 Hoban, M. L., Whitney, J., Collins, A. G., Meyer, C., Murphy, K. R., Reft, A. J., & Bemis, K. E.  
703 (2022). Skimming for barcodes: rapid production of mitochondrial genome and nuclear  
704 ribosomal repeat reference markers through shallow shotgun sequencing. *PeerJ*, 10, e13790.
- 705
- 706 Horowitz, J., Opresko, D. M., Molodtsova, T. N., Beaman, R., Cowman, P. F., & Bridge, T. C.  
707 L. (2022). Five new species of black coral (Anthozoa; Antipatharia) from the Great Barrier Reef  
708 and Coral Sea, Australia. *Zootaxa*, 5213:1-23. <https://doi.org/10.11646/Zootaxa.5213.1.1>.

709  
710 Horowitz, J., Quattrini, A. Q., Brugler, M. R., Miller, D. J., Pahang, K., Bridge, T. C. L., &  
711 Cowman, P. F. (2022a). Bathymetric evolution of black corals through deep time, *Proceedings of*  
712 *the Royal Society, B*:1-9. <https://doi.org/10.1098/rspb.2023.1107>.  
713  
714 Horowitz, J., Opresko D.M., González-García M.P., & Quattrini A. M. (2023b). Description of a  
715 new species of black coral in the family Aphanipathidae (Anthozoa, Antipatharia) from Puerto  
716 Rico. *ZooKeys*, 1173: 97-110. <https://doi.org/10.3897/zookeys.1173.104141>.  
717  
718 Kalyaanamoorthy, S., Minh, B. Q., Wong, T. K., Von Haeseler, A., & Jermini, L. S. (2017).  
719 ModelFinder: fast model selection for accurate phylogenetic estimates. *Nature methods*, 14(6),  
720 587-589.  
721  
722 Katoh, K., & Standley, D. M. (2013). MAFFT multiple sequence alignment software version 7:  
723 improvements in performance and usability. *Molecular biology and evolution*, 30(4), 772-780.  
724  
725 Lin, M. F., Kitahara, M. V., Luo, H., Tracey, D., Geller, J., Fukami, H., ... & Chen, C. A. (2014).  
726 Mitochondrial genome rearrangements in the Scleractinia/Corallimorpharia complex:  
727 implications for coral phylogeny. *Genome Biology and Evolution*, 6(5), 1086-1095.  
728  
729 Liu, B. B., Ma, Z. Y., Ren, C., Hodel, R. G., Sun, M., Liu, X. Q., ... & Wen, J. (2021). Capturing  
730 single-copy nuclear genes, organellar genomes, and nuclear ribosomal DNA from deep genome  
731 skimming data for plant phylogenetics: A case study in Vitaceae. *Journal of Systematics and*  
732 *Evolution*, 59(5), 1124-1138.  
733  
734 Malé, P. J. G., Bardon, L., Besnard, G., Coissac, E., Delsuc, F., Engel, J., ... & Chave, J. (2014).  
735 Genome skimming by shotgun sequencing helps resolve the phylogeny of a pantropical tree  
736 family. *Molecular ecology resources*, 14(5), 966-975.  
737  
738 McCartin, L., Saso, E., Vohsen, S., Pittoors, N., Demetriades, P., McFadden, C., Quattrini, A., &  
739 Herrera, S. review .Nuclear eDNA Meta-barcoding Primers for Anthozoan Coral Biodiversity  
740 Assessment.  
741  
742 McFadden, C. S., Quattrini, A. M., Brugler, M. R., Cowman, P. F., Dueñas, L. F., Kitahara, M.  
743 V., ... & Rodríguez, E. (2021). Phylogenomics, origin, and diversification of anthozoans (Phylum  
744 Cnidaria). *Systematic Biology*, 70(4), 635-647.  
745  
746 McFadden, C. S., van Ofwegen, L. P., & Quattrini, A. M. (2022). Revisionary systematics of  
747 Octocorallia (Cnidaria: Anthozoa) guided by phylogenomics. *Bulletin of the Society of*  
748 *Systematic Biologists*, 1(3).  
749  
750 Nguyen, L. T., Schmidt, H. A., Von Haeseler, A., & Minh, B. Q. (2015). IQ-TREE: a fast and  
751 effective stochastic algorithm for estimating maximum-likelihood phylogenies. *Molecular*  
752 *biology and evolution*, 32(1), 268-274.  
753  
754

- 755 Opresko, D. M., Goldman, S. L., Johnson, R., Parra, K., Nuttall, M., Schmahl, G. P., & Brugler,  
756 M. R. (2020). Morphological and molecular characterization of a new species of black coral  
757 from Elvers Bank, north-western Gulf of Mexico (Cnidaria: Anthozoa: Hexacorallia:  
758 Antipatharia: Aphanipathidae: Distichopathes). *Journal of the Marine Biological Association of*  
759 *the United Kingdom*, 100, 559-566.
- 760
- 761 Pappalardo, P., Collins, A. G., Pagenkopp Lohan, K. M., Hanson, K. M., Truskey, S. B., Jaeckle,  
762 W., ... & Osborn, K. J. (2021). The role of taxonomic expertise in interpretation of  
763 metabarcoding studies. *ICES Journal of Marine Science*, 78(9), 3397-3410.
- 764
- 765 Park, S. T., & Kim, J. (2016). Trends in next-generation sequencing and a new era for whole  
766 genome sequencing. *International neurology journal*, 20(Suppl 2), S76.
- 767
- 768 Polisenio, A., Feregrino, C., Sartoretto, S., Aurelle, D., Wörheide, G., McFadden, C. S., &  
769 Vargas, S. (2017). Comparative mitogenomics, phylogeny and evolutionary history of  
770 Leptogorgia (Gorgoniidae). *Molecular Phylogenetics and Evolution*, 115, 181-189.
- 771
- 772 Quattrini, A. M., Faircloth, B. C., Dueñas, L. F., Bridge, T. C., Brugler, M. R., Calixto-Botía, I.  
773 F., ... & McFadden, C. S. (2018). Universal target-enrichment baits for anthozoan (Cnidaria)  
774 phylogenomics: New approaches to long-standing problems. *Molecular ecology resources*,  
775 18(2), 281-295.
- 776
- 777 Quattrini, A. M., Wu, T., Soong, K., Jeng, M. S., Benayahu, Y., & McFadden, C. S. (2019). A  
778 next generation approach to species delimitation reveals the role of hybridization in a cryptic  
779 species complex of corals. *BMC Evolutionary Biology*, 19, 1-19.
- 780
- 781 Quattrini, A. M., Rodríguez, E., Faircloth, B. C., Cowman, P. F., Brugler, M. R., Farfan, G. A.,  
782 ... & McFadden, C. S. (2020). Palaeoclimate ocean conditions shaped the evolution of corals and  
783 their skeletons through deep time. *Nature Ecology & Evolution*, 4(11), 1531-1538.
- 784
- 785 Quattrini, A. M., Snyder, K. E., Purow-Ruderman, R., Seiblitiz, I. G., Hoang, J., Floerke, N., ... &  
786 McFadden, C. S. (2023). Mito-nuclear discordance within Anthozoa, with notes on unique  
787 properties of their mitochondrial genomes. *Scientific Reports*, 13(1), 7443.
- 788
- 789 Rana, K.M.S., Ahammad, K., & Salam, M.A. (2020). Bioinformatics: scope and challenges in  
790 aquaculture research of Bangladesh- a review. *International Journal of Agricultural Research,*  
791 *Innovation and Technology*, 10(2), 137-145.
- 792
- 793 Ransome, E., Geller, J. B., Timmers, M., Leray, M., Mahardini, A., Sembiring, A., ... & Meyer,  
794 C. P. (2017). The importance of standardization for biodiversity comparisons: A case study using  
795 autonomous reef monitoring structures (ARMS) and metabarcoding to measure cryptic diversity  
796 on Mo'orea coral reefs, French Polynesia. *PLoS One*, 12(4), e0175066.
- 797
- 798 Reitzel A.M., S. Herrera, M.J. Layden, M.Q. Martindale & T.M. Shank (2013) Going where  
799 traditional markers have not gone before: utility and promise for RAD-sequencing in marine

- 800 invertebrate phylogeography and population genomics. *Molecular Ecology*. 22(11):2953-2970.  
801 <http://doi.org/10.1111/mec.12228>.
- 802 Seiblit, I. G., Vaga, C. F., Capel, K. C. C., Cairns, S. D., Stolarski, J., Quattrini, A. M., &  
803 Kitahara, M. V. (2022). Caryophylliids (Anthozoa, Scleractinia) and mitochondrial gene order:  
804 Insights from mitochondrial and nuclear phylogenomics. *Molecular phylogenetics and evolution*,  
805 175, 107565.
- 806 Taite, M., Fernández-Álvarez, F. Á., Braid, H. E., Bush, S. L., Bolstad, K., Drewery, J., ... &  
807 Allcock, A. L. (2023). Genome skimming elucidates the evolutionary history of Octopoda.  
808 *Molecular Phylogenetics and Evolution*, 182, 107729.
- 809 Tin, M. M. Y., Economo, E. P., & Mikheyev, A. S. (2014). Sequencing degraded DNA from  
810 non-destructively sampled museum specimens for RAD-tagging and low-coverage shotgun  
811 phylogenetics. *PloS one*, 9(5), e96793.
- 812 Torres-Suárez, O. L. (2014). *Gorgonia mariae* and *Antillogorgia bipinnata* populations inferred  
813 from compensatory base change analysis of the internal transcribed spacer 2. *Molecular*  
814 *phylogenetics and evolution*, 79, 240-248.
- 815 Trevisan, B., Alcantara, D. M., Machado, D. J., Marques, F. P., & Lahr, D. J. (2019). Genome  
816 skimming is a low-cost and robust strategy to assemble complete mitochondrial genomes from  
817 ethanol preserved specimens in biodiversity studies. *PeerJ*, 7, e7543.
- 818 Untiedt, C. B., Quattrini, A. M., McFadden, C. S., Alderslade, P. A., Pante, E., & Burrige, C. P.  
819 (2021). Phylogenetic relationships within *Chrysogorgia* (Alcyonacea: Octocorallia), a  
820 morphologically diverse genus of octocoral, revealed using a target enrichment approach.  
821 *Frontiers in Marine Science*, 7, 599984.
- 822 Whiteford, N., Heron, A., McCline, L., Flidr, A., Swett, J., Karpur, A. (2023). Towards  
823 ubiquitous metagenomic sequencing: a technology roadmap. *Convergent Research - News*.  
824 <http://sequencing-roadmap.org/>  
825
- 826 Yeates, D. K., Zwick, A., & Mikheyev, A. S. (2016). Museums are biobanks: unlocking the  
827 genetic potential of the three billion specimens in the world's biological collections. *Current*  
828 *opinion in insect science*, 18, 83-88.
- 829 Yek, C., Pacheco, A. R., Vanaerschot, M., Bohl, J. A., Fahsbender, E., Aranda-Diaz, A., ... &  
830 Manning, J. (2022). Metagenomic pathogen sequencing in resource-scarce settings: Lessons  
831 learned and the road ahead. *Frontiers in Epidemiology*, 2.
- 832 Zapata, F., Goetz, F. E., Smith, S. A., Howison, M., Siebert, S., Church, S. H., ... & Cartwright,  
833 P. (2015). Phylogenomic analyses support traditional relationships within Cnidaria. *PloS one*,  
834 10(10), e0139068.
- 835 Zeng, C. X., Hollingsworth, P. M., Yang, J., He, Z. S., Zhang, Z. R., Li, D. Z., & Yang, J. B.  
836 (2018). Genome skimming herbarium specimens for DNA barcoding and phylogenomics. *Plant*  
837 *Methods*, 14, 1-14.

838

839 Zhang, L., Huang, Y. W., Huang, J. L., Ya, J. D., Zhe, M. Q., Zeng, C. X., ... & Yang, J. B.  
840 (2023). DNA barcoding of *Cymbidium* by genome skimming: Call for next-generation nuclear  
841 barcodes. *Molecular Ecology Resources*, 23(2), 424-439.

842

843

844

Draft
